# Supplementary material
Source: PubMed Central journal article supplement (PMC3119116)
Supplement: supp_00544.2010_legends.pdf [file supp_00544.2010_legends.pdf]

**Supplemental Figure 1. Hepatic p21 and p15 mRNA accumulation in wild-type and *egr-1*<sup>-/-</sup> mice.** Hepatic mRNA accumulation of (A) p21 and (B) p15 were determined at 24, 48 and 72h after CCl<sub>4</sub> exposure, or in olive oil controls, using real-time PCR. Five wild-type and 6 *egr-1*<sup>-/-</sup> mice were analyzed at each time point. Values with different alphabetical superscripts are significantly different from one another (p<0.05).

**Supplemental Figure 2. Immediate early gene expression after CCl<sub>4</sub> exposure.** One, two and four hours after CCl<sub>4</sub> exposure, mice were euthanized and livers analyzed for hepatic mRNA accumulation of (A) c-jun and (B) c-fos by real-time PCR. Five wild-type and 6 *egr-1*<sup>-/-</sup> mice were analyzed at each time point. Values with different alphabetical superscripts are significantly different from one another (p<0.05).

**Supplemental Figure 3. Hepatic cdc20 expression after CCl<sub>4</sub>.** Relative amounts of hepatic cdc20 mRNA were determined in wild-type and *egr-1*<sup>-/-</sup> mice using real-time PCR at the indicated time points after CCl<sub>4</sub> exposure. Five wild-type and 6 *egr-1*<sup>-/-</sup> mice were analyzed at each time point. Values with different alphabetical superscripts are significantly different from one another (p<0.05).

**Supplemental Figure 4. PCNA staining pattern and cell cycle stage.** PCNA immunohistochemistry was utilized to determine the number of cells at each stage of the cell cycle in wild-type (top) and *egr-1*<sup>-/-</sup> (bottom) mice 48h after CCl<sub>4</sub> exposure. G0, no staining, blue throughout; G1, light brown nuclei, blue cytoplasm; S, dark brown nuclei, blue cytoplasm; G2, brown nuclei and cytoplasm as nuclear envelope disintegrates or blue nuclei (no chromosomes evident) with brown cytoplasm just before mitosis; M, blue chromosomes, brown cytoplasm plus presence of mitotic figures and/or daughter cells not fully separate from one another but with two distinct blue/brown nuclei. 200X images are representative of 5 wild-type and 6 *egr-1*<sup>-/-</sup> mice. Quantification of cell cycle stage 48h post CCl<sub>4</sub> exposure is found in Figure 1A.
