# Supplementary material
Source: PubMed Central journal article supplement (PMC3119116)
Supplement: supp_00544.2010_tableS1.pdf [file supp_00544.2010_tableS1.pdf]

1  
2  
3  
4  
5  
6  
7  
8  
9  
10  
11  
12  
13  
14  
15  
16  
17  
18  
19  
20  
21  
22  
23  
24  
25  
26  
27  
28  
29  
30  
31  
32  
33  
34  
35  
36  
37  
38  
39  
40  
41  
42  
43  
44  
45  
46  
47  
48

Table 1: Real time PCR primer sequences for genes of interest (GOI)

| <b>GOI</b> | <b>Primer Sequences</b>                                                                |
|------------|----------------------------------------------------------------------------------------|
| 18S        | F: 5' – ACG GAA GGG CAC CAC CAG GA – 3'<br>R: 5' – CAC CAC CAC CCA CGG AAT CG – 3'     |
| c-jun      | F: 5' - CCTTCTACGACGATGCCCTC – 3'<br>R: 5' – GGTTCAAGGTCATGCTCTGTTT – 3'               |
| c-fos      | F: 5' – TCACGCTCAGCATCCCATC – 3'<br>R: 5' – ACTTCTACGCATGTCTCTCTAGG – 3'               |
| Egr-1      | F: 5' – AGC GAA CAA CCC TAT GAG CAC – 3''<br>R: 5' – TCG TTT GGC TGG GAT AAC TCG – 3'' |
| Cyclin E1  | F: 5' – GTGGCTCCGACCTTTCAGTC – 3'<br>R: 5' – CACAGTCTTGTCAATCTTGGCA – 3'               |
| Cyclin D1  | F: 5' – CAGAAGTGCGAAGAGGAGGTC – 3'<br>R: 5' – TCATCTTAGAGGCCACGAACAT – 3'              |
| Cyclin A2  | F: 5' – GCCTTCACCATTTCATGTGGAT – 3'<br>R: 5' – TTGCTGCGGGTAAAGAGACAG – 3'              |
| Cyclin B1  | F: 5' – AAGGTGCCTGTGTGTGAACC – 3'<br>R: 5' – GTCAGCCCCATCATCTGCG – 3'                  |
| p21        | F: 5' – CCTGGTGATGTCCGACCTG – 3'<br>R: 5' – CCATGAGCGCATCGCAATC – 3'                   |
| p15        | F: 5' – CCCTGCCACCCTTACCAGA – 3'<br>R: 5' – CAGATACCTCGCAATGTCACG – 3'                 |
| Cdc20      | F: 5' – TTCGTGTTTCGAGAGCGATTTG – 3'<br>R: 5' – ACCTTGGAAGTAGATTTGCCAG – 3'             |

Primer Bank, <http://pga.mgh.harvard.edu/primerbank/>; Xiaowei Wang and Brian Seed (2003) A PCR primer bank for quantitative gene expression analysis. *Nucleic Acids Research* 31(24): e154; pp.1-8.
