# Supplementary material
Source: PubMed Central journal article supplement (PMC3119116)
Supplement: supp_00544.2010_tableS2.pdf [file supp_00544.2010_tableS2.pdf]

1  
2  
3  
4  
5  
6  
7  
8  
9  
10  
11  
12  
13  
14  
15  
16  
Supplementary Table 2: Plasma alanine aminotransferase (ALT) and aspartate aminotransferase (AST) activities after CCl<sub>4</sub> exposure

| Time post CCl <sub>4</sub> (h) | wild-type   |             | <i>egr-1</i> <sup>-/-</sup> |              |
|--------------------------------|-------------|-------------|-----------------------------|--------------|
|                                | ALT (U/L)   | AST (U/L)   | ALT (U/L)                   | AST (U/L)    |
| oil                            | 20 ± 0.4    | 31 ± 1.3    | 26.8 ± 4.3                  | 56.1 ± 4.3   |
| 24                             | 1664 ± 381  | 1600 ± 67   | 2058 ± 539                  | 2772 ± 830   |
| 36                             | 8255 ± 1676 | 9369 ± 2501 | 10031 ± 1110                | 12330 ± 2691 |

ALT and AST activities were determined as described in [18]. There are no significant differences in ALT or AST between genotypes at 24 or 36h after CCl<sub>4</sub> exposure.
