# Supplementary material
Source: PubMed Central journal article supplement (PMC3119116)

SUPPLEMENTAL DATA FIGURE 1

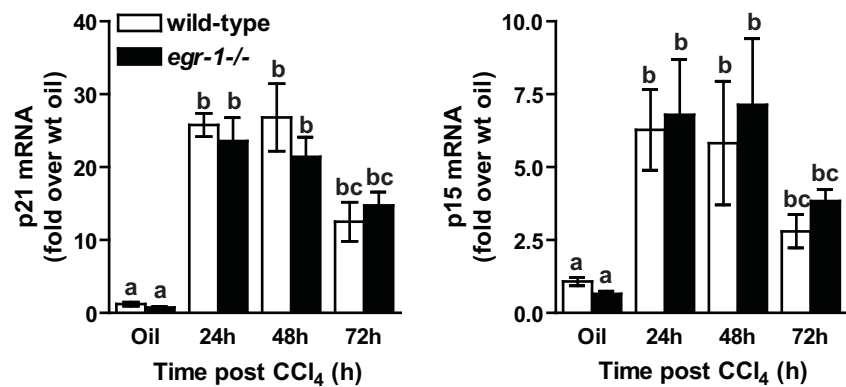

Supplement: supp_00544.2010_figS1.pdf [file supp_00544.2010_figS1.pdf]

Supplemental data Figure 2

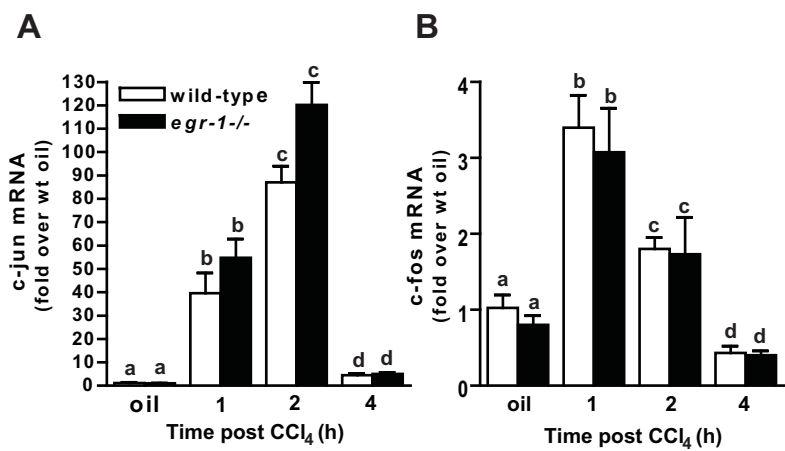

Supplement: supp_00544.2010_figS2.pdf [file supp_00544.2010_figS2.pdf]

Supplemental data Figure 3

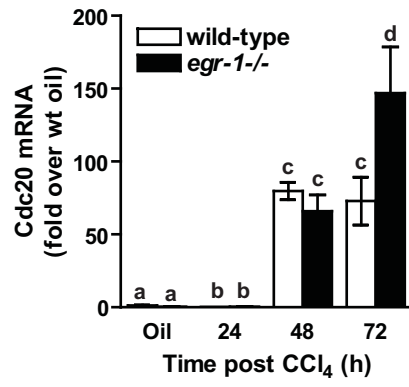

Supplement: supp_00544.2010_figS3.pdf [file supp_00544.2010_figS3.pdf]

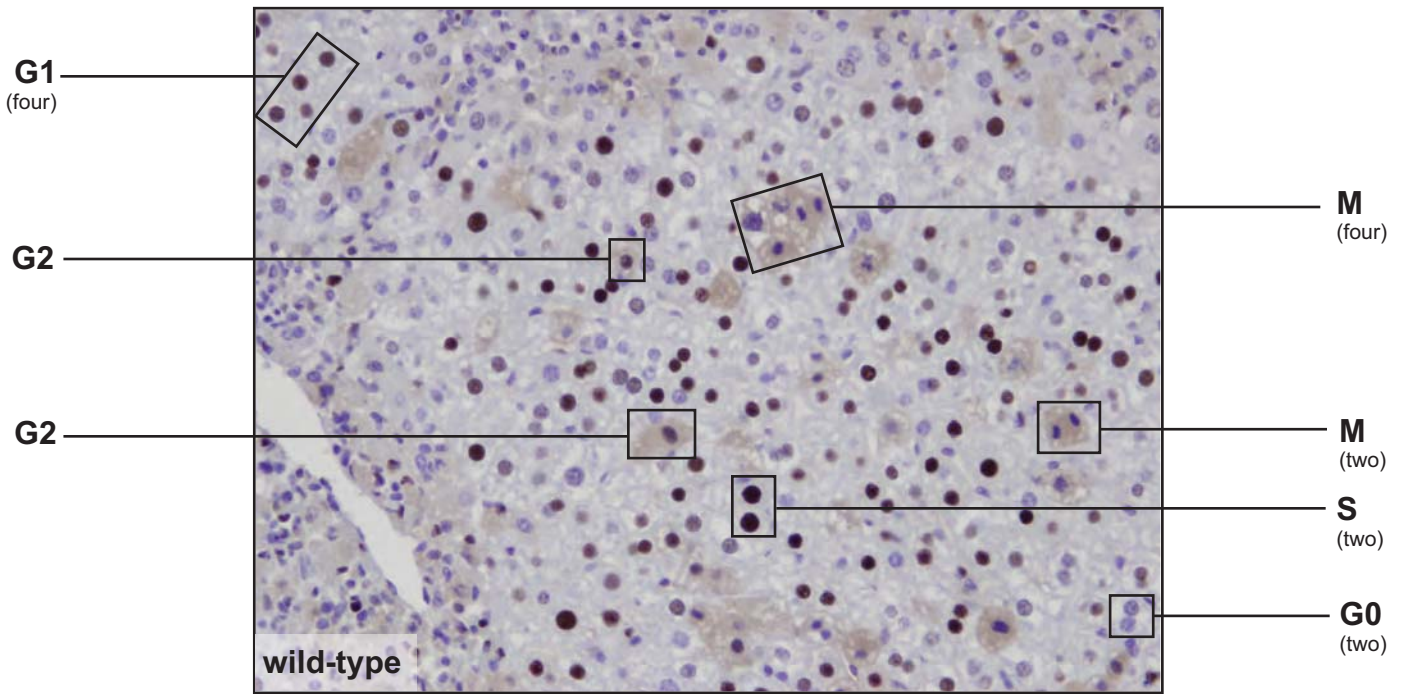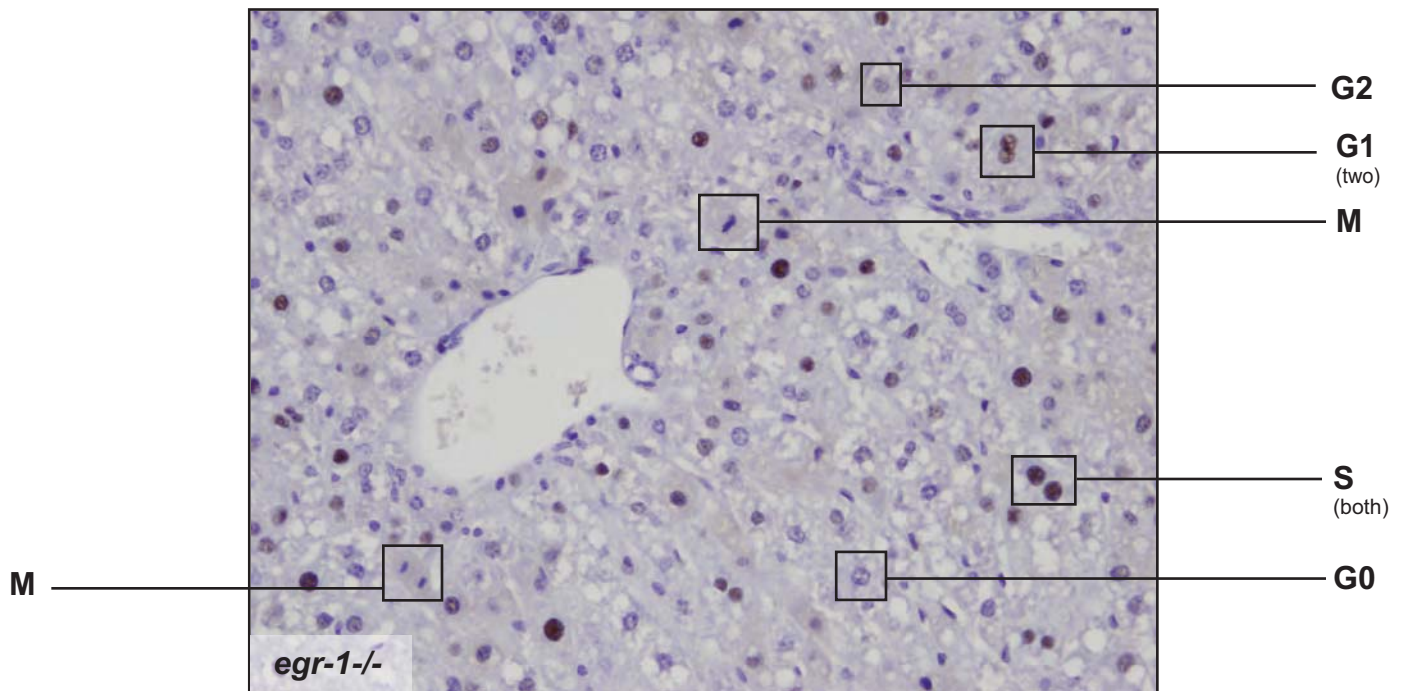

Supplement: supp_00544.2010_figS4.pdf [file supp_00544.2010_figS4.pdf]
